# Supplementary material for: Oral Cancer Prevalence, Mortality, and Costs in Medicaid and Commercial Insurance Claims Data
Source: Oxford University Press journal article supplement (doi:10.1158/1055-9965.epi-22-0114), 2022-06-22
Supplement: epi-22-0114_supplementary_figure_s2_suppsf2.docx [file epi-22-0114_supplementary_figure_s2_suppsf2.docx]

**Supplementary Figure S2**: Annual incidence* of oral/oropharyngeal cancer among Medicaid and commercial insurance cohorts, by age group

** Per 100,000 population*
