# Supplementary material for: Oral Cancer Prevalence, Mortality, and Costs in Medicaid and Commercial Insurance Claims Data
Source: Oxford University Press journal article supplement (doi:10.1158/1055-9965.epi-22-0114), 2022-06-22
Supplement: epi-22-0114_supplementary_table_s1_suppst1.doc [file epi-22-0114_supplementary_table_s1_suppst1.doc]

**Supplementary Table S1:** Prevalence* and incidence* of OC/OPC in Medicaid and commercial insurance groups, by year

|  | | **Medicaid** | | | | **Commercial** | | | |
| --- | --- | --- | --- | --- | --- | --- | --- | --- | --- |
| Patients | | Enrollees | | Patients | | Enrollees | |
| OC | OPC | OC | OPC | OC | OPC | OC | OPC |
| **Prevalence** | 2015 | 79.6 | 66.4 | 54.4 | 45.4 | 41.6 | 44.9 | 33.6 | 36.3 |
| 2016 | 74.7 | 68.6 | 48.7 | 44.7 | 40.9 | 43.3 | 32.9 | 34.8 |
| 2017 | 76.9 | 67.9 | 48.5 | 42.8 | 37.6 | 41.9 | 30.3 | 33.8 |
| 2018 | 75.7 | 69.4 | 46.4 | 42.5 | 37.3 | 39.7 | 30.1 | 32.0 |
| 2019 | 75.4 | 70.4 | 45.8 | 42.7 | 40.8 | 41.4 | 32.1 | 32.6 |
| **Total** | **82.8** | **71.1** | **55.2** | **47.4** | **44.2** | **45.7** | **35.6** | **36.8** |
| **Incidence** | 2015 | 28.7 | 22.7 | -- | -- | 15.6 | 16.3 | -- | -- |
| 2016 | 23.1 | 20.8 | -- | -- | 16.8 | 16.5 | -- | -- |
| 2017 | 23.7 | 18.7 | -- | -- | 15.9 | 16.5 | -- | -- |
| 2017 | 21.1 | 17.1 | -- | -- | 13.0 | 12.7 | -- | -- |
| 2018 | 20.5 | 17.1 | -- | -- | 16.2 | 14.7 | -- | -- |
| **Total** | **23.5** | **19.3** | **--** | **--** | **18.5** | **18.4** | **--** | **--** |

**per 100,000 population*
