# Supplementary material for: Oral Cancer Prevalence, Mortality, and Costs in Medicaid and Commercial Insurance Claims Data
Source: Oxford University Press journal article supplement (doi:10.1158/1055-9965.epi-22-0114), 2022-06-22
Supplement: epi-22-0114_supplementary_table_s2_suppst2.doc [file epi-22-0114_supplementary_table_s2_suppst2.doc]

**Supplementary Table S2:** Prevalence of OC/OPC in Medicaid and commercial insurance groups by type

| **ICD-10 Code** | **Type** | **Site** | **Medicaid** | **Commercial** |
| --- | --- | --- | --- | --- |
| C14 | Oral Cancer | Malignant neoplasm of other and ill-defined sites in the lip, oral cavity and pharynx | 14% | 4% |
| C01 | Oral Cancer | Malignant neoplasm of base of tongue | 15% | 21% |
| C06 | Oral Cancer | Malignant neoplasm of other and unspecified parts of mouth | 9% | 7% |
| C02.9 | Oral Cancer | Malignant neoplasm of other and unspecified parts of the tongue | 6% | 8% |
| C04 | Oral Cancer | Malignant neoplasm of floor of mouth | 4% | 2% |
| C00 | Oral Cancer | Malignant neoplasm of lip | 3% | 4% |
| C05 | Oral Cancer | Malignant neoplasm of palate | 2% | 1% |
| C03 | Oral Cancer | Malignant neoplasm of gum | 1% | 2% |
| C10 | Oropharyngeal cancer | Malignant neoplasm of oropharynx | 16% | 17% |
| C09 | Oropharyngeal cancer | Malignant neoplasm of tonsil | 8% | 10% |
| C11.9 | Oropharyngeal cancer | Malignant neoplasm of nasopharynx, unspecified | 7% | 8% |
| C13.9 | Oropharyngeal cancer | Malignant neoplasm of hypopharynx, unspecified | 7% | 2% |
| C08.9 | Oropharyngeal cancer | Malignant neoplasm of major salivary gland, unspecified | 6% | 11% |
| C08 | Oropharyngeal cancer | Malignant neoplasm of other and unspecified major salivary glands | 1% | 2% |
| C12 | Oropharyngeal cancer | Malignant neoplasm of pyriform sinus | 1% | 0% |
